# Supplementary material for: BMPR-IB gene disruption causes severe limb deformities in pigs
Source: PubMed Central journal article supplement — Zool Res. 2022 May 18;43(3):391–403. doi: 10.24272/j.issn.2095-8137.2021.291 (PMC9113981; doi:10.24272/j.issn.2095-8137.2021.291), 2022-05-18
Supplement: zr-43-3-391-S1.pdf [file zr-43-3-391-S1.pdf]

## Supplementary Materials

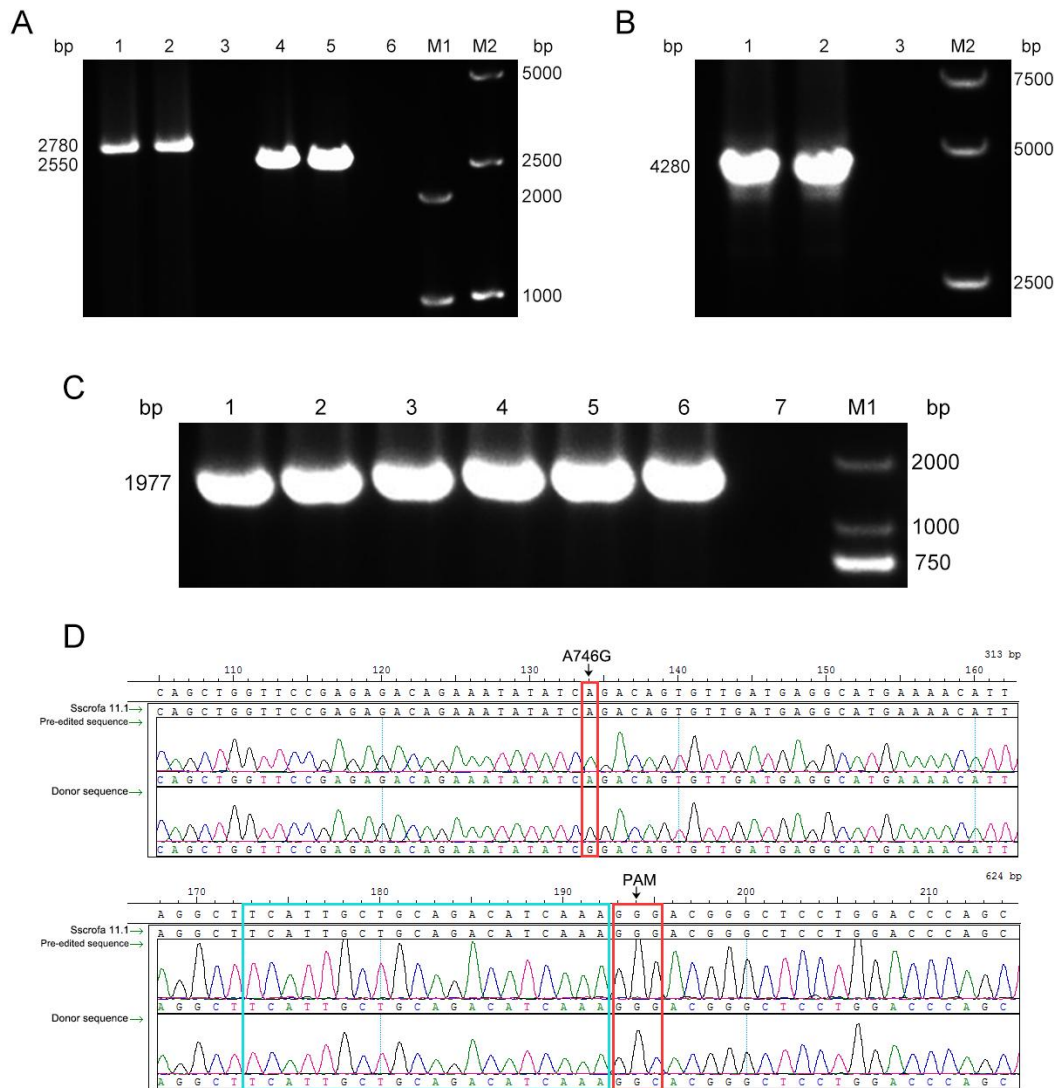

**Supplementary Figure S1** Generation of DNA donor template. A-C: Amplification of DNA donor template that encompassed the target point mutation by bridging PCR. D: Sequencing chromatograms of *BMPR-IB* A746G mutation (red box in upper panel) and sgRNA sequence (blue box) in DNA donor template.

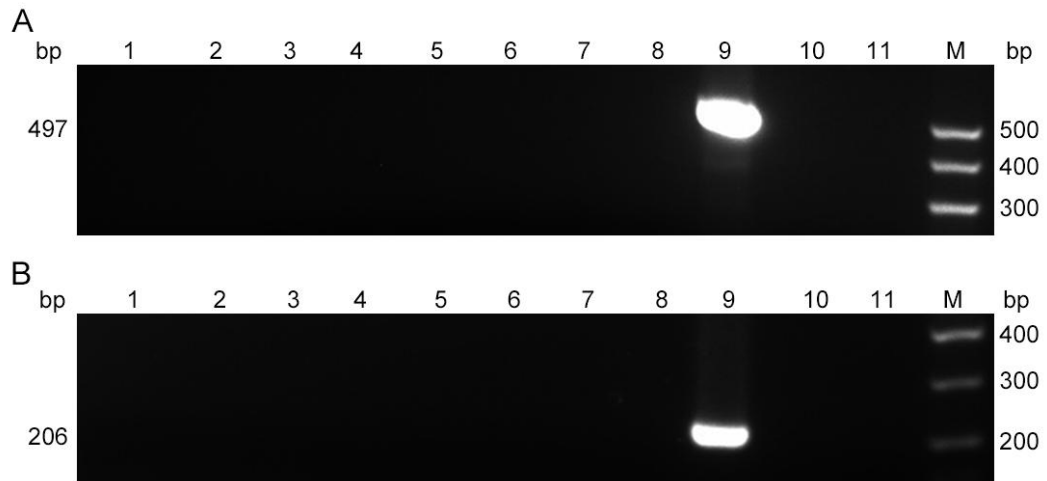

**Supplementary Figure S2** Routine PCR detection of integration of CRISPR plasmids in cloned piglets. A: Cas9. B: sgRNA. Lanes 1 to 8 indicate amplification of DNA from cloned piglets (1, *BMPR-IB*<sup>-/-</sup>; 2–5, *BMPR-IB*<sup>-/746G</sup>; 6–8, WT). 9, PX458 DNA; 10, DNA from WT pig; 11, water. M indicates DL 500 DNA marker.

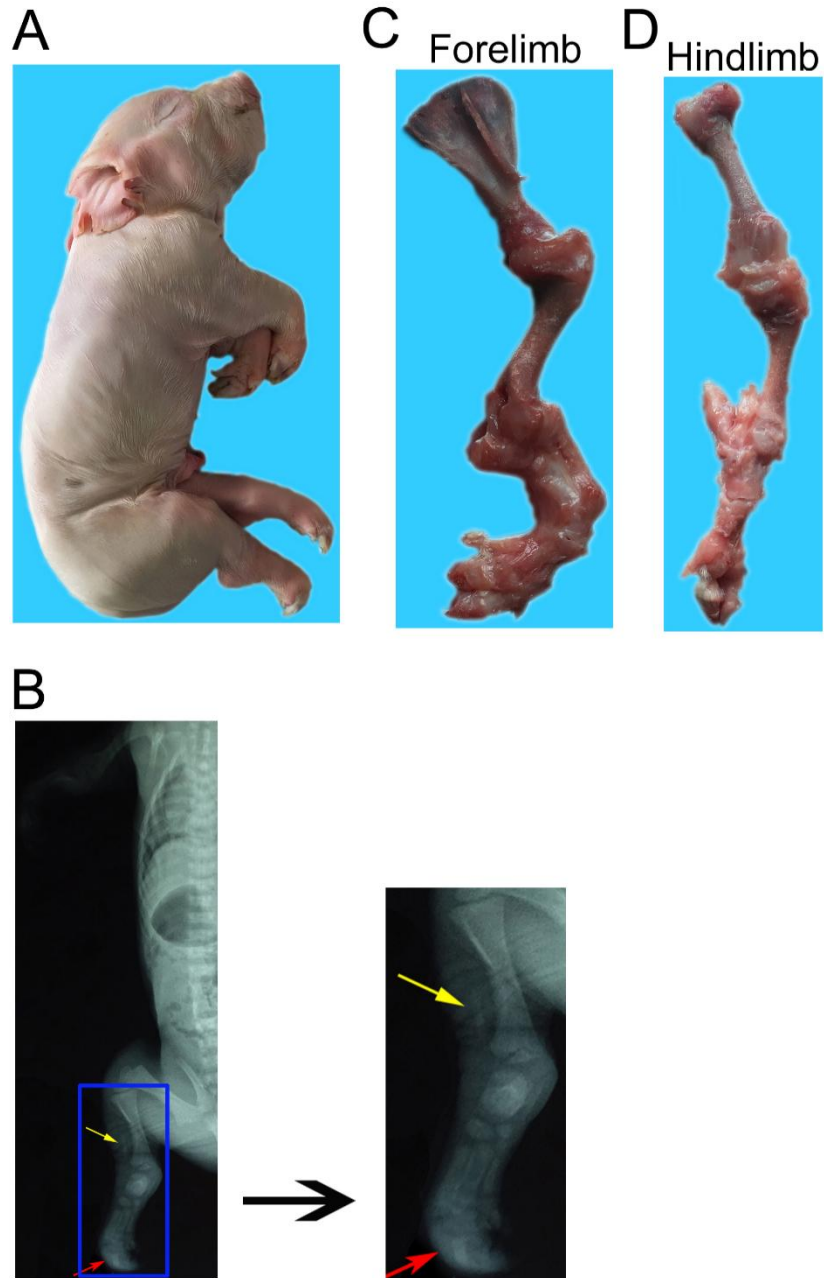

**Supplementary Figure S3** Phenotypic characterization of *BMPR-IB*-disrupted *BMPR-IB*<sup>-/746G</sup> piglet (different from that in Figure 2). A: Whole-body photograph. B: Radiograph of hindlimb. C: Anatomical view of forelimb. D: Anatomical view of hindlimb. Missing fibula and third proximal phalanx (os compedale) are marked with yellow and red arrows, respectively.

A

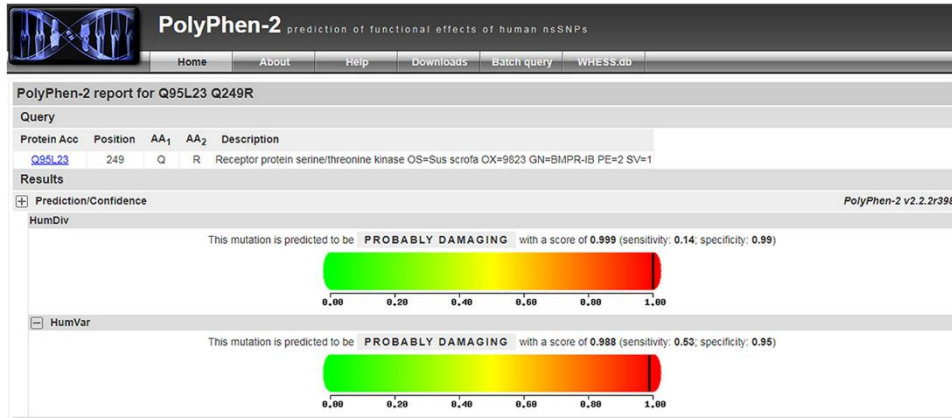

B

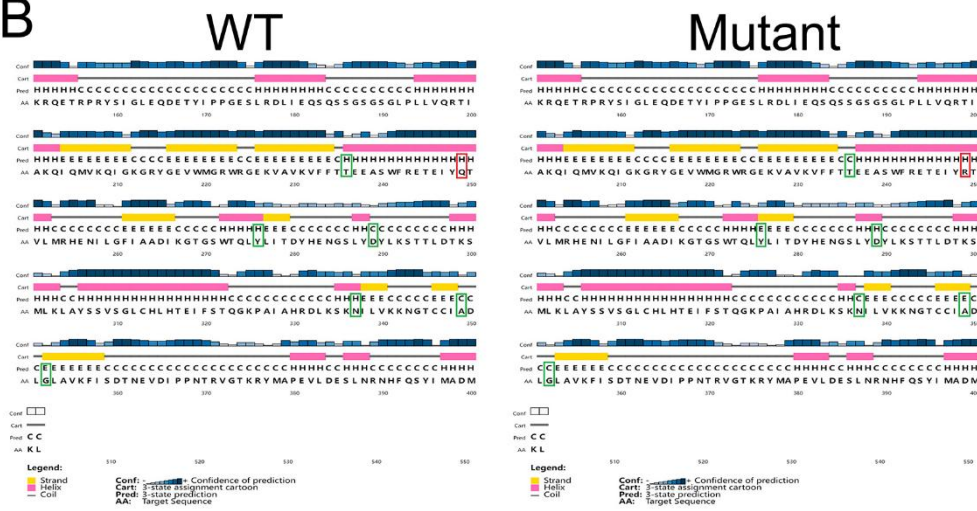

C

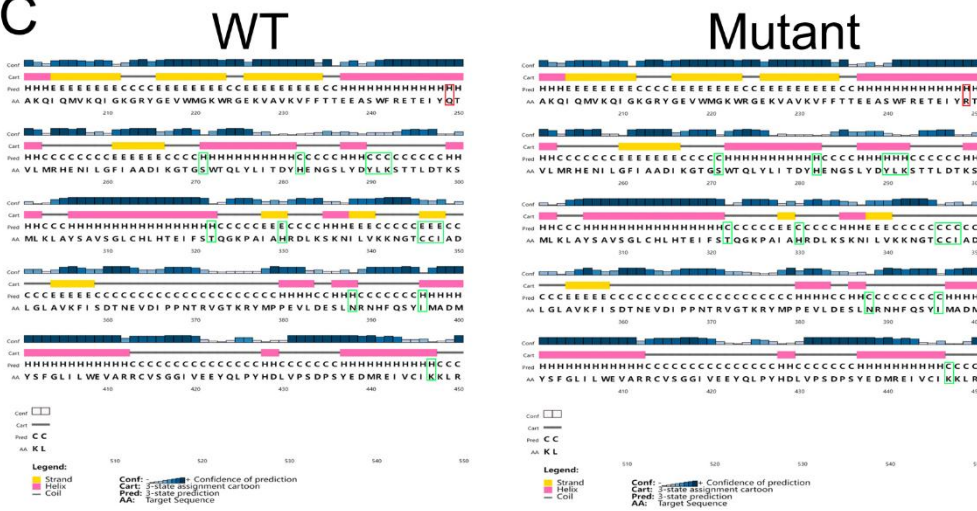

**Supplementary Figure S4** Prediction of functional effect of *BMPR-IB*-A746G mutation. A: Prediction based on PolyPhen-2 (<http://genetics.bwh.harvard.edu/pph2/>). This score represents the probability that a substitution is damaging, ranging from 0.0 (tolerated) to 1.0 (deleterious). Analysis suggested that A746G mutation is a deleterious substitution: HumDiv, probably damaging, score 0.999; HumVar, probably damaging, score 0.988. B: Structural comparison of *BMPR-IB*-746AA and

BMPR-IB-746GG protein in porcine using PSIPRED (<http://bioinf.cs.ucl.ac.uk/psipred/>). C: Structural comparison of BMPR-IB-746AA and BMPR-IB-746GG protein in sheep using PSIPRED. H, C, and E represent alpha helix, random coil, and extended strand, respectively.

**Supplementary Table S1** PCR primers, excluding those for detecting off-target sites

| Primer No. | Primer name           | Forward primer (5'-3')          | Reverse primer (5'-3')      | Amplicon (bp) |
|------------|-----------------------|---------------------------------|-----------------------------|---------------|
| 1          | BMPRIB-sgRNA          | CACCGTCATTGCTGCAGACATCAAA       | AAACTTTGATGTCTGCAGCAATGAC   | 25            |
| 2          | sgRNA-F/R             | CAGTGTTTCTCTACCCCTCCTG          | GTTCTTCTTTTTCCCTGCAA        | 653           |
| 3          | BMPRIB-long-1         | AACTAAATGGTTTCTGGTGTCTGTCA<br>T | TCATGCCTCATCAAACTGTCCGATAT  | 2864          |
| 4          | BMPRIB-long-2         | AGACAGAAATATATCGGACAGTGTT<br>CA | GATACTGCCAGATGTTTTCTCTTGAAG | 2536          |
| 5          | BMPRIB-long-3         | TTTCGGAAACGGTGATAACTCCTCGT<br>A | CTTTAGAAACAAATCCGTCAGAGGGTC | 4337          |
| 6          | BMPRIB-donor          | AAAGTATTCTAACCTGCCATTACCA<br>T  | ATGATCCTTCTGTACCTGTGATTGTC  | 1977          |
| 7          | BMPRIB-A746G          | CAGATGGTGAAACAGATTGGA           | TAGGAAACCCTGAACATTGC        | 205           |
| 8          | BMPRIB-del-lon<br>α-1 | CGTGGTAAGATAGCGGATTGCTGGAT      | TGATGGAAGACGACACAAACAAATGG  | 9245          |
| 9          | Cas9                  | CGAGGAAGTGGTGGACAAG             | CGAACAGGTGGGCATAGG          | 497           |
| 10         | gRNA                  | CAAGGCTGTTAGAGAGATAATTGG        | GTGTTTCGTCCTTTCCACAA        | 206           |
| 11         | BMPRIB-SYBR           | CCTGGGTCTGGCTGTCAAAT            | GGTGTTGGGTGGTATGTCG         | 66            |
| 12         | GAPDH-SYBR            | CACTCTTCCACTTTTGATGCTG          | CCTGTTGCTGTAGCCAAATTC       | 99            |

**Supplementary Table S2** Primers for PCR detection of predicted off-target sites

| Off-target site | Primer direction | Primer sequence               |
|-----------------|------------------|-------------------------------|
| 1               | FP               | 5'- ACAAGCCTCTGGGTGACAG -3'   |
|                 | RP               | 5'- CTGGGGTGCCTCCTTCTAAC -3'  |
| 2               | FP               | 5'- AGATGAACGGGAAGGAGGAG -3'  |
|                 | RP               | 5'- AGGGACAGAAAAGGGGAATG -3'  |
| 3               | FP               | 5'- TATGGGGTCAAGGGATGTGT -3'  |
|                 | RP               | 5'- GGGAAACAGAAGAAGCAGGA -3'  |
| 4               | FP               | 5'- GGTTTGGGTGTTTCAGGAGA -3'  |
|                 | RP               | 5'- TCCCTACATGCCAGCAGATT -3'  |
| 5               | FP               | 5'- CTGTTTTACCGACACCAAG -3'   |
|                 | RP               | 5'- ATTCTTCCACTCCCAGACCT -3'  |
| 6               | FP               | 5'- CTGTTTTACCGACACCAAG -3'   |
|                 | RP               | 5'- CGTTCCTCAAGCATAAGACAA -3' |
| 7               | FP               | 5'- GAGATGGTGGTGGGAGAAGA -3'  |
|                 | RP               | 5'- TCAGAACAGGGGAACTCAGC -3'  |
| 8               | FP               | 5'- GAGGGTGAGGTTTCTGGTTG -3'  |
|                 | RP               | 5'- GTGACAGCGAAGCAGGTACA -3'  |
| 9               | FP               | 5'- TGCCCTATGCTGTTGTATGC -3'  |
|                 | RP               | 5'- ATTGGCTGGAATCACTGCTG -3'  |
| 10              | FP               | 5'- CCCTCGGGAAACTAAACCTC -3'  |
|                 | RP               | 5'- AGCTCTGTGCCTCTGGATGT -3'  |
| 11              | FP               | 5'- AGCCTGAGCAAGAAGGAAGA -3'  |
|                 | RP               | 5'- AGAGGAAGATGGAGCAATGG -3'  |
| 12              | FP               | 5'- GTGGCTAGAAGGATGGTGGGA -3' |
|                 | RP               | 5'- GGCCCTAAGTATGGATGGTT -3'  |
| 13              | FP               | 5'- GAGGGAAGGGAAGCAAAGAG -3'  |
|                 | RP               | 5'- TGGGAACCTTGGAAAACTG -3'   |
| 14              | FP               | 5'- CGGCGTCCCTCTGTTAGTG -3'   |
|                 | RP               | 5'- CCACCCCATTCCTTCCTG -3'    |
| 15              | FP               | 5'- CCAGGTGGAGAGGAGGAAGT -3'  |
|                 | RP               | 5'- GGTCCTTAACCCACTGAGCA -3'  |

**Supplementary Table S3** Summary of *BMPR-IB* A746G mutation in cell colonies

| Type                    | Total | Homozygotes | Heterozygotes | Indels | Wild type |
|-------------------------|-------|-------------|---------------|--------|-----------|
| Number of cell colonies | 113   | 16          | 23            | 30     | 44        |
| Proportion              | 100%  | 14.16%      | 20.35%        | 26.55% | 38.94%    |

**Supplementary Table S4** Detection of predicted off-target sites by Sanger sequencing

| Off-target site | Sequence                 | Gene                   | Locus                | Result |
|-----------------|--------------------------|------------------------|----------------------|--------|
| 1               | TCCATGCTGCAGACATCA<br>AG |                        | Chr2: +74435012      | -      |
| 2               | ACATAGCAGGAGACATCA<br>AA |                        | Chr1: -41849987      | -      |
| 3               | ACATAGCAGGAGACATCA<br>AA |                        | Chr1: -41719398      | -      |
| 4               | TTAGTGCCGGAGACATCA<br>AA | ENSSSCG000000161<br>48 | Chr15:<br>+123162535 | -      |
| 5               | TCTCAGCAGCAGACATCA<br>AA | ENSSSCG000000100<br>30 | Chr14:<br>+51329154  | -      |
| 6               | GGGTGGCTGCAGACATCA<br>AA |                        | Chr16: -18569987     | -      |
| 7               | ATATTGCTGCAGCCATCAA<br>A |                        | Chr3: -139007881     | -      |
| 8               | TCATAGCTGGACACATCA<br>AA |                        | Chr3: -5611747       | -      |
| 9               | TGATTGGTGCATACATCAA<br>A |                        | Chr2:<br>+133467423  | -      |
| 10              | TGAAGGATGCAGACATCA<br>AA |                        | Chr6: -83149645      | -      |
| 11              | TCATTCATGGAGACATCAA<br>A |                        | Chr8: +7594530       | -      |
| 12              | GCTTGGCTACAGACATCA<br>AA |                        | Chr15: -18948461     | -      |
| 13              | TCCTTGTGGGAGACATCA<br>AA |                        | Chr1:<br>+184885654  | -      |
| 14              | ACACTACAGCAGACATCA<br>AA |                        | Chr2: +1605477       | -      |
| 15              | CCTTTTCTGGAGACATCAA<br>A |                        | Chr14:<br>+153156809 | -      |

Note: BENCHILING online search address: <https://www.benchling.com/>. “-” indicated no off-target effect.
